# Supplementary material
Source: publisher figshare collection journal article supplement (https://acs.figshare.com/ndownloader/files/4036564)
Supplement: Supplementary file 1 [file 4036564]

**Supporting information for:**

**Fully Coherent Triple Sum Frequency Spectroscopy**

**of a Benzene Fermi Resonance**

Erin S. Boyle, Andrei V. Pakoulev, and John C. Wright\*

*Department of Chemistry, University of Wisconsin - Madison, Madison, WI*

E-mail: [wright@chem.wisc.edu](mailto:wright@chem.wisc.edu)

---

\*To whom correspondence should be addressed

## Modeling

Eq. 1 numerically integrates the evolution of the density matrix elements from the initial  $\rho_{gg}$  population to the  $\rho_{eg}$  output coherence. The program implements this integration in the form

$$\Delta\rho(t) = \left(\frac{i}{2}\Omega(t) \cdot \rho(t) - \Gamma\rho(t)\right)\Delta t. \quad (1)$$

$\Delta\rho$  (Eq. 1) is found at successive points in time with time increment  $\Delta t$ . The  $\rho$  vector contains the Liouville densities in each relevant state of the WMEL diagram and the  $\Gamma$  vector contains corresponding dephasing parameters. All density begins in  $\rho_{gg}$  but propagates through the states by the action of  $\Omega$ . The  $\Omega$  matrix contains nonzero  $\Omega_{ij}$  elements only where the chosen pathway allows density to move from  $\rho_i$  to  $\rho_j$ . In this case the matrix element within the rotating wave approximation is  $\pm\mu_{ij}E_k^o(t)e^{\pm i\omega_k t}e^{\mp i\omega_{ij}t}$ , with positive terms representing ket-side transitions and negatives term bra-side, and the phase of the exponential determined by the phase of the interaction. The complex field  $E_k(t)$  is calculated at each time increment and is defined by a Gaussian envelope with frequency  $\omega_k$ . The model requires two time orderings—one for each infrared beam supplying the first interaction—and the resulting  $\rho_{eg}$  values were added at each point in time. The output frequency distribution was obtained by Fourier transformation of the  $\rho_{eg}$  time dependence, and in cases where the monochromator was simulated, the distribution was apodized with the monochromator filter function.  $\Omega_1$ ,  $\Omega_2$ ,  $\rho$ , and  $\Gamma$  for benzene TSF are the following:

$$\Omega_1 = \begin{bmatrix} 0 & 0 & 0 & 0 & 0 \\ \mu_{ag}e^{i\omega_{ag}t}E_1 & 0 & 0 & 0 & 0 \\ 0 & \mu_{2aa}e^{i\omega_{2aa}t}E_2 & 0 & 0 & 0 \\ 0 & \mu_{ba}e^{i\omega_{ba}t}E_2 & 0 & 0 & 0 \\ 0 & 0 & \mu_{e2a}e^{i\omega_{e2a}t}E_3 & \mu_{eb}e^{i\omega_{eb}t}E_3 & 0 \end{bmatrix}$$

$$\begin{aligned}
\Omega_2 &= \begin{bmatrix} 0 & 0 & 0 & 0 & 0 \\ \mu_{ag} e^{i\omega_{ag}t} E_2 & 0 & 0 & 0 & 0 \\ 0 & \mu_{2aa} e^{i\omega_{2aa}t} E_1 & 0 & 0 & 0 \\ 0 & \mu_{ba} e^{i\omega_{ba}t} E_1 & 0 & 0 & 0 \\ 0 & 0 & \mu_{e2a} e^{\omega_{e2a}} E_3 & \mu_{eb} e^{\omega_{eb}} E_3 & 0 \end{bmatrix} \\
\rho &= \begin{bmatrix} \rho_{gg} & \rho_{ag} & \rho_{2ag} & \rho_{bg} & \rho_{eg} \end{bmatrix} \\
\Gamma &= \begin{bmatrix} \Gamma_{gg} = 0 \\ \Gamma_{ag} \\ \Gamma_{2ag} \\ \Gamma_{bg} \\ \Gamma_{eg} = fast \end{bmatrix}
\end{aligned}$$

## Further discussion of TSF 2D frequency scan

Simulations were performed for the Triple Sum Frequency (TSF) spectra in Fig. 3. Fig. S1(a) shows the same experimental data as Fig. 3 but at the amplitude level, and S1(c) performs the same scan with the monochromator tracking  $\omega_m = \omega_1 + \omega_2 + \omega_3$ . A comparison is done to simulations generated using the approach described in the theoretical section (Figs. S1(b) and S1(d)). As discussed for Fig. 3, these time delays emphasize free induction decay such that  $\omega_4 = \omega_{v'g}$ . Since  $\omega_{v'g}$  is narrower than the  $20 \text{ cm}^{-1}$  FWHM pulses of  $\omega_1$  and  $\omega_2$ ,  $\omega_m = \omega_1 + \omega_2 + \omega_3$  will not be equal to  $\omega_4$  where  $\omega_1$  and  $\omega_2$  are either both higher or both lower than the peak central frequency, and the monochromator resolved scan will lose signal at those locations. This gives the peak an antidiagonal character.

One must be cautious in interpretation of these spectra. As discussed in the theory section, driven signal will have the characteristic  $\Delta_2 \equiv \omega_{v'g} - \omega_1 - \omega_2 - i\Gamma_{v'g}$ , and this will also result in an antidiagonal lineshape. However, this lineshape will be antidiagonal even without monochromator resolution, a characteristic we have observed in spectra collected near zero delay. In the case of

purely driven signal, we predict that tracking the monochromator with  $\omega_m = \omega_1 + \omega_2 + \omega_3$  should not result in a change in lineshape.

Finally, it has been noted that the peaks in Figs. 3 and S1 appear especially broad. It is not entirely clear what this is due to, but one contributor is likely poor pulse compression. Models are carried out with pulses having defined temporal duration, matching that which is measured experimentally. This intrinsically defines spectral width, but these spectral widths in reality are often measured to be  $\sim 5 \text{ cm}^{-1}$  broader than the Fourier transform of their temporal duration would indicate (i.e.  $20 \text{ cm}^{-1}$  rather than  $15 \text{ cm}^{-1}$ ). Thus the simulation does not perfectly represent the experimental parameters.

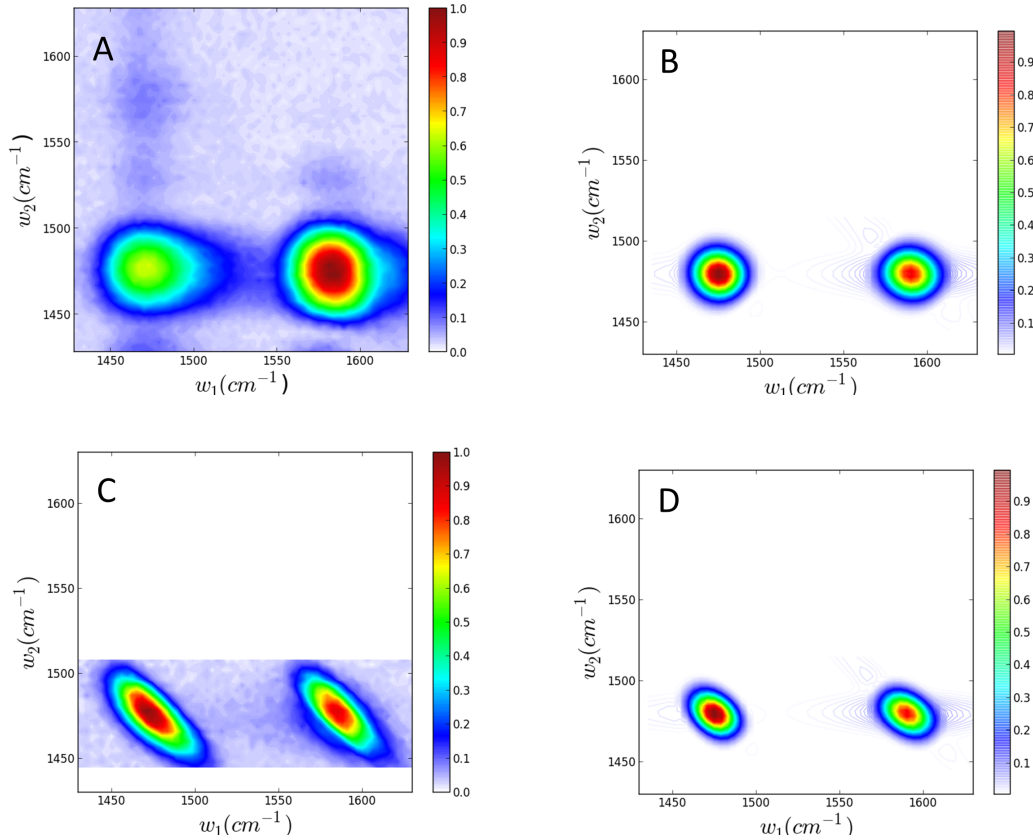

Figure S1: TSF Spectra of 2D frequency scans with  $\tau_{21}=-1.2 \text{ ps}$ ,  $\tau_{31}=1 \text{ ps}$ ; all plots at Amplitude level. The left hand spectra ((a) and (c)) are experimental data while the right ((b) and (d)) are simulations of the data using the frequencies and line-widths reported by Bertie.<sup>S1</sup> The top two spectra ((a) and (b)) have the monochromator at zero order (and experimentally use filters to reject  $\omega_3$ ), while the bottom two ((c) and (d)) have spectrally resolved output following  $\omega_m = \omega_1 + \omega_2 + \omega_3$  with  $11 \text{ cm}^{-1}$  resolution.

## TSF 2D frequency scan with $2\vec{k}_2 + \vec{k}_3$ leak

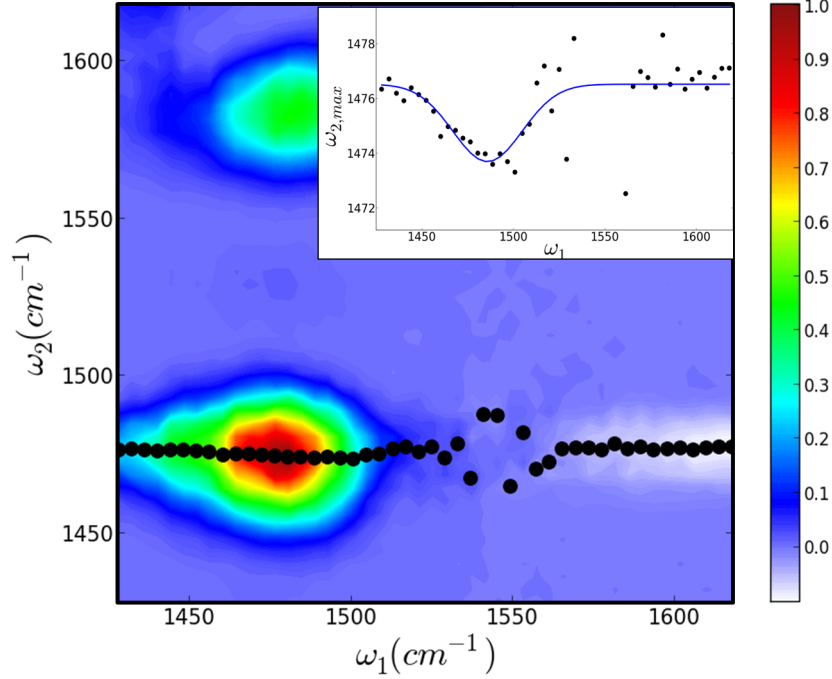

Figure S2: This figure shows the result of subtraction of the average value of the  $\vec{k}_4'$  signal on the TSF spectrum in Fig. 5 where  $\tau_{21}=1.5$  ps and  $\tau_{31}=3$  ps. Black data points show the maximum of  $\omega_2$  for the  $\vec{k}_4$  signal at each  $\omega_1$  frequency. The inset plots the maximum  $\omega_2$  value as a function of  $\omega_1$ . The minimum at  $(\omega_1, \omega_2) = 1478, 1473.7$   $\text{cm}^{-1}$  occurs when the  $\vec{k}_4$  TSF process is fully resonant with the fundamental and overtone states.

Fig. 5 contains contributions from both the  $\vec{k}_4 = \vec{k}_1 + \vec{k}_2 + \vec{k}_3$  and  $\vec{k}_4' = 2\vec{k}_2 + \vec{k}_3$  TSF signal. The central  $\omega_2$  values of the  $\vec{k}_4'$  horizontal stripe were found by Gaussian fit as discussed in the main body of the paper to extract  $\frac{2\omega_{vg} - \delta}{2} = 1477.2$   $\text{cm}^{-1}$ . In order to find the central  $\omega_2$  values of  $\vec{k}_4$  signal,  $\vec{k}_4'$  first had to be subtracted. This separation was achieved by subtracting the average intensity of each  $\omega_2$  point in the  $\vec{k}_4'$  region ( $\omega_1 = 1520$ - $1570$   $\text{cm}^{-1}$ ) from the 2D spectrum to leave only the  $\vec{k}_4$  diagonal peak. Diagonal peak  $\omega_2$  slices were then fit to a Gaussian profile to accurately define the peak  $\omega_2$  frequency as function of  $\omega_1$  (Fig. S2 black dots and inset). These central values varied smoothly and showed that the peak center occurs at  $\omega_2 = 1473.7$   $\text{cm}^{-1}$ . The difference between the  $\vec{k}_4$  and  $\vec{k}_4'$  peak positions ( $\delta/2$ ) is  $3.5$   $\text{cm}^{-1}$  so  $\delta = 7$   $\text{cm}^{-1}$ .

## Further discussion of TSF Wigner scan

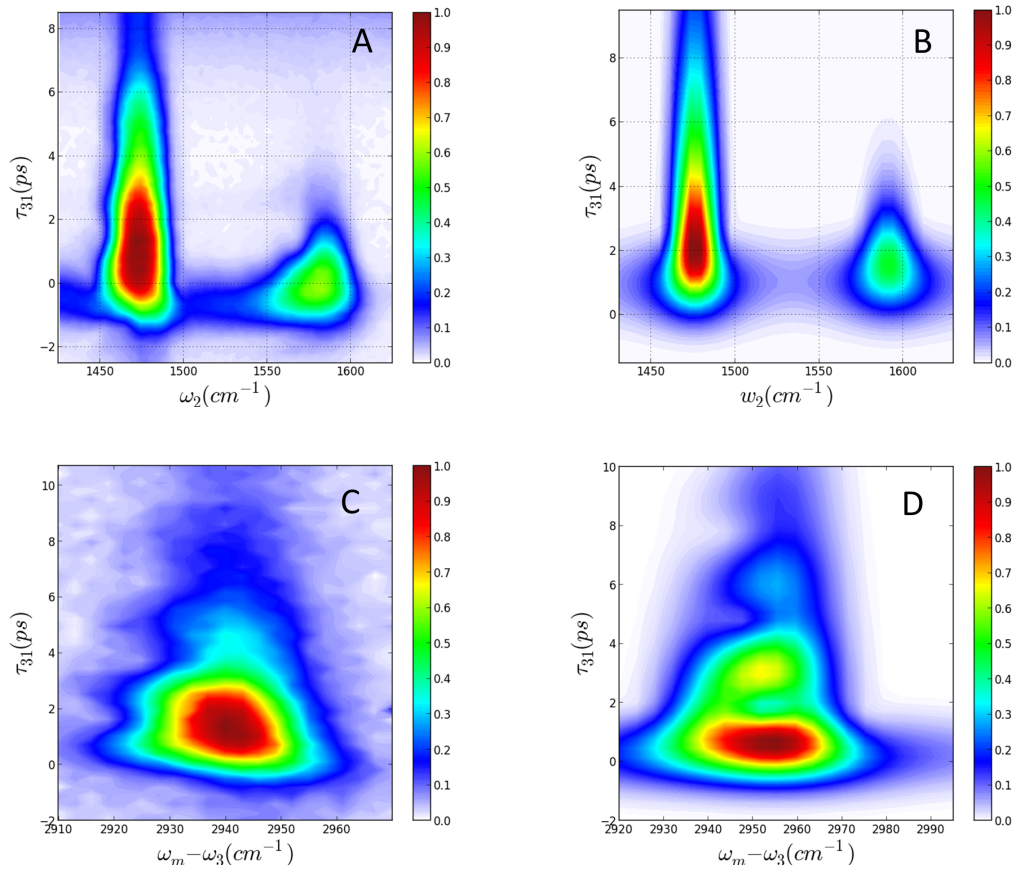

Figure S3: (a) Wigner plot collected with  $\tau_{21} = 0$ ,  $\omega_1 = 1480$  cm<sup>-1</sup>, and  $\omega_m = \omega_1 + \omega_2 + \omega_3$ , and (b) model of the same, using dephasing rates predicted in Table 1 and not including additional states. With  $\tau_{21} = 0$ ,  $\omega_1 = 1480$  cm<sup>-1</sup>, and  $\omega_2 = 1465$  cm<sup>-1</sup>, beating is present as a function of  $\omega_m$  and  $\tau_{31}$  even if  $\omega_2$  is not scanned (c). This is simulated in (d) with the inclusion of a secondary state with frequency 2936 cm<sup>-1</sup> as appears in the Raman spectrum, and which is excited in proportion to its Raman intensity relative to the 2948 cm<sup>-1</sup> peak. (All plots at amplitude level.)

The Wigner plot in Fig. S3 traces out the overtone and cross-peak lifetimes of the TSF states. Simulations of this spectrum were obtained using the approach described in the Theory section and assuming dephasing rates predicted by the Raman linewidths of Table 1. The delay times in the simulations were adjusted by 1 ps in order to correct for error in setting the experimental delay times. It was observed that if the monochromator was used to spectrally isolate the output in a Wigner plot, beating occurred along for the  $2\nu_{13}$  state as a function of the  $\tau_{31}$  delay time. The peri-

odicity of this beating ( $\sim 2.3$  ps) indicates a state of about  $14\text{ cm}^{-1}$  away generating an interfering output. A mode is visible  $12.5\text{ cm}^{-1}$  to the red in the Raman spectrum, and is incorporated into (d) along with a monochromator on the output. It is unclear whether that state is populated directly, or by coherence transfer, and the nature of this state (some combination band) is unconfirmed.

## Further discussion of TSF M-factors

Since Triple Sum Frequency (TSF) Coherent Multidimensional Spectroscopy (CMDS) cannot be phase matched for normal refractive index dispersion, it is expected that multidimensional spectra would be strongly influenced by the sample path length, absorption of the excitation beams, and the refractive index dispersion. In order to understand the effects, a series of simulations were performed using the M-factor defined in Eq. 6 and the TSF-CMDS intensity defined in Eq. 7. Eq. 7 assumes the resonances for the first two interactions occur at the peaks of the absorption spectrum but the resonance associated with the second interaction is shifted by  $8\text{ cm}^{-1}$  by the Fermi resonance and anharmonic coupling. Thus, the absorption coefficient in the numerator that corresponds to the CMDS enhancements is offset from the absorption coefficients associated with the M-factor. In addition, the line shape of the second resonance is better represented by the line shape of the  $2948.5\text{ cm}^{-1}$  Raman in Table 1 and Fig. 2(b). These effects were incorporated into the simulations.

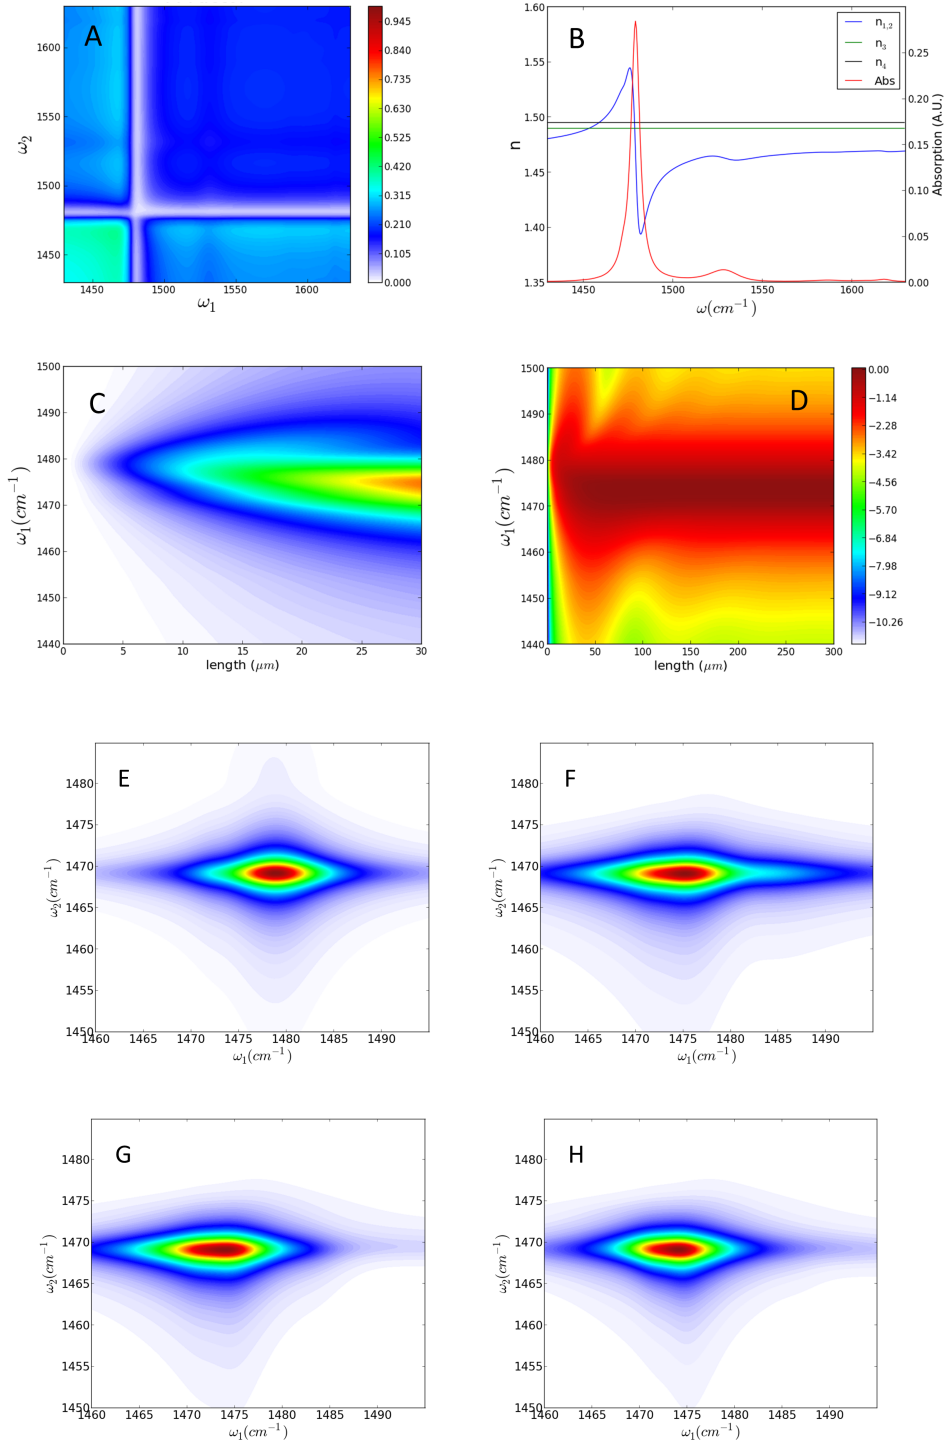

Figure S4: (a) M-factor calculated according to Eq. 6 for a benzene sample with 15  $\mu\text{m}$  path length and  $\pm 10^\circ$  phase-matching angles using the indices from Bertie<sup>S2,S3</sup> plotted in (b). In (b), the blue trace shows indices as a function of IR frequency, the green and black traces shows the index of refraction at the  $\omega_3$  (12,500  $\text{cm}^{-1}$ ) and  $\omega_4$  ( $\sim 15,500 \text{ cm}^{-1}$ ) frequencies, and the red trace gives the absorption through the same region of the infrared. (c) shows the M-factor weighted intensities as a function of path length and (d) shows the same on a logarithmic scale. (e)-(h) show changes in lineshape for 5, 25, 50, and 150  $\mu\text{m}$  path lengths, respectively.



Fig. S4 shows a series of graphs that illustrate the different effects of M-factor. Fig. S4(a) shows the two dimensional dependence of the M-factor on the excitation frequencies using the absorption and refractive index data of Bertie. Fig. S4(b) shows the absorption spectrum and refractive index dispersion over the same region. Fig. S4(c) shows the dependence of the TSF-CMDS intensity on the sample path length and the  $\omega_1$  fundamental excitation frequency with  $\omega_2 = 1470 \text{ cm}^{-1}$ . The intensity reaches a maximum and then becomes independent of the path length as the increased absorption of the excitation pulses becomes the limiting factor. The peak position also shifts to lower frequency at longer path lengths, as the absorption and refractive index dispersion become more important. The four wave mixing efficiency is improved at  $\omega_1$  frequencies that excite the fundamental resonance but are off-set from the strong absorption and asymmetrical phase matching effects (occurring at the center of the fundamental absorption spectrum and to the higher energy side of it, respectively). Fig. S4(d) shows the logarithmic intensity dependence at longer path lengths. The modulations apparent in the spectrum are caused by Brewster fringes arising from the sinc function in Eq. 7. Figs. S4(e)-(h) show a series of two dimensional TSF-CMDS spectral simulations for path lengths ranging from 5 to 150  $\mu\text{m}$ . The peak is off-set from the diagonal by the shift in the resonances for the first and second interactions. There are changes in the asymmetry of the peak and there is the same shift of the peak position along the  $\omega_1$  axis. Note that in a true experiment this peak variation of a few  $\text{cm}^{-1}$  would be convoluted by spectral width of the exciting fields, and would not likely manifest strongly.

## References

- (S1) Bertie, J. E. John Bertie's Download Site. 2011; <http://www.ualberta.ca/~jbertie/JBDownload.HTM>.
- (S2) Bertie, J. E.; Jones, R. N.; Keefe, C. D. Infra-red Intensities of Liquids .12. Accurate Optical Constants and Molar Absorption Coefficients Between 6225 and 500  $\text{cm}^{-1}$  of Benzene at 25 degrees C, from Spectra Recorded in Several Laboratories. *Appl. Spectrosc.* **1993**, *47*, 891–911.
- (S3) Bertie, J. E.; Lan, Z. The Refractive Index of Colorless Liquids in the Visible and Infrared - Contributions from the Absorption of Infrared and Ultraviolet Radiation and the Electronic Molar Polarizability Below 20500  $\text{cm}^{-1}$ . *J. Chem. Phys.* **1995**, *103*, 10152–10161.
